# Supplementary material for: Novel design that utilizes to electron transfer and decoupling of acid components to improves performance for next generation battery technology
Source: Research Square preprint supplement (doi:10.21203/rs.3.rs-3770370/v1), 2023-12-25
Supplement: Supplementary file 1 [file 962906ec28e34c9dae781575.docx]

**SUPPLEMENTRY DATA**

**Novel design that utilizes to electron transfer and decoupling of acid components to improves performance for next generation battery technology**

Abdul Qayoom Mugheria,e*, Kashif **Alib, Ali Asghar sangahc**, Muhammad Younis Lagharid Arsalan Ahmed Mugheria

aDr. M.A Kazi Institute of Chemistry University of Sindh Jamshoro, 76080, Sindh Pakistan bHunan Key Laboratory for Super Microstructure and Ultrafast Process, School of Physics and Electronics, Central South University, Changsha 410083, China cDepartment of Basic Sciences and Related Studies, Mehran University of Engineering and Technology, Jamshoro, 76080, Pakistan dThe Department of Fisheries and Aquatic Sciences University of Sindh Jamshoro, 76080, Sindh Pakistan eNational center of excellence in Analytical Chemistry University of Sindh Jamshoro, 76080, Sindh Pakistan

*Corresponding author: Abdul Qayoom Mugheri, PhD Email address: [a.qmugheri87@gmail.com](mailto:a.qmugheri87@gmail.com)


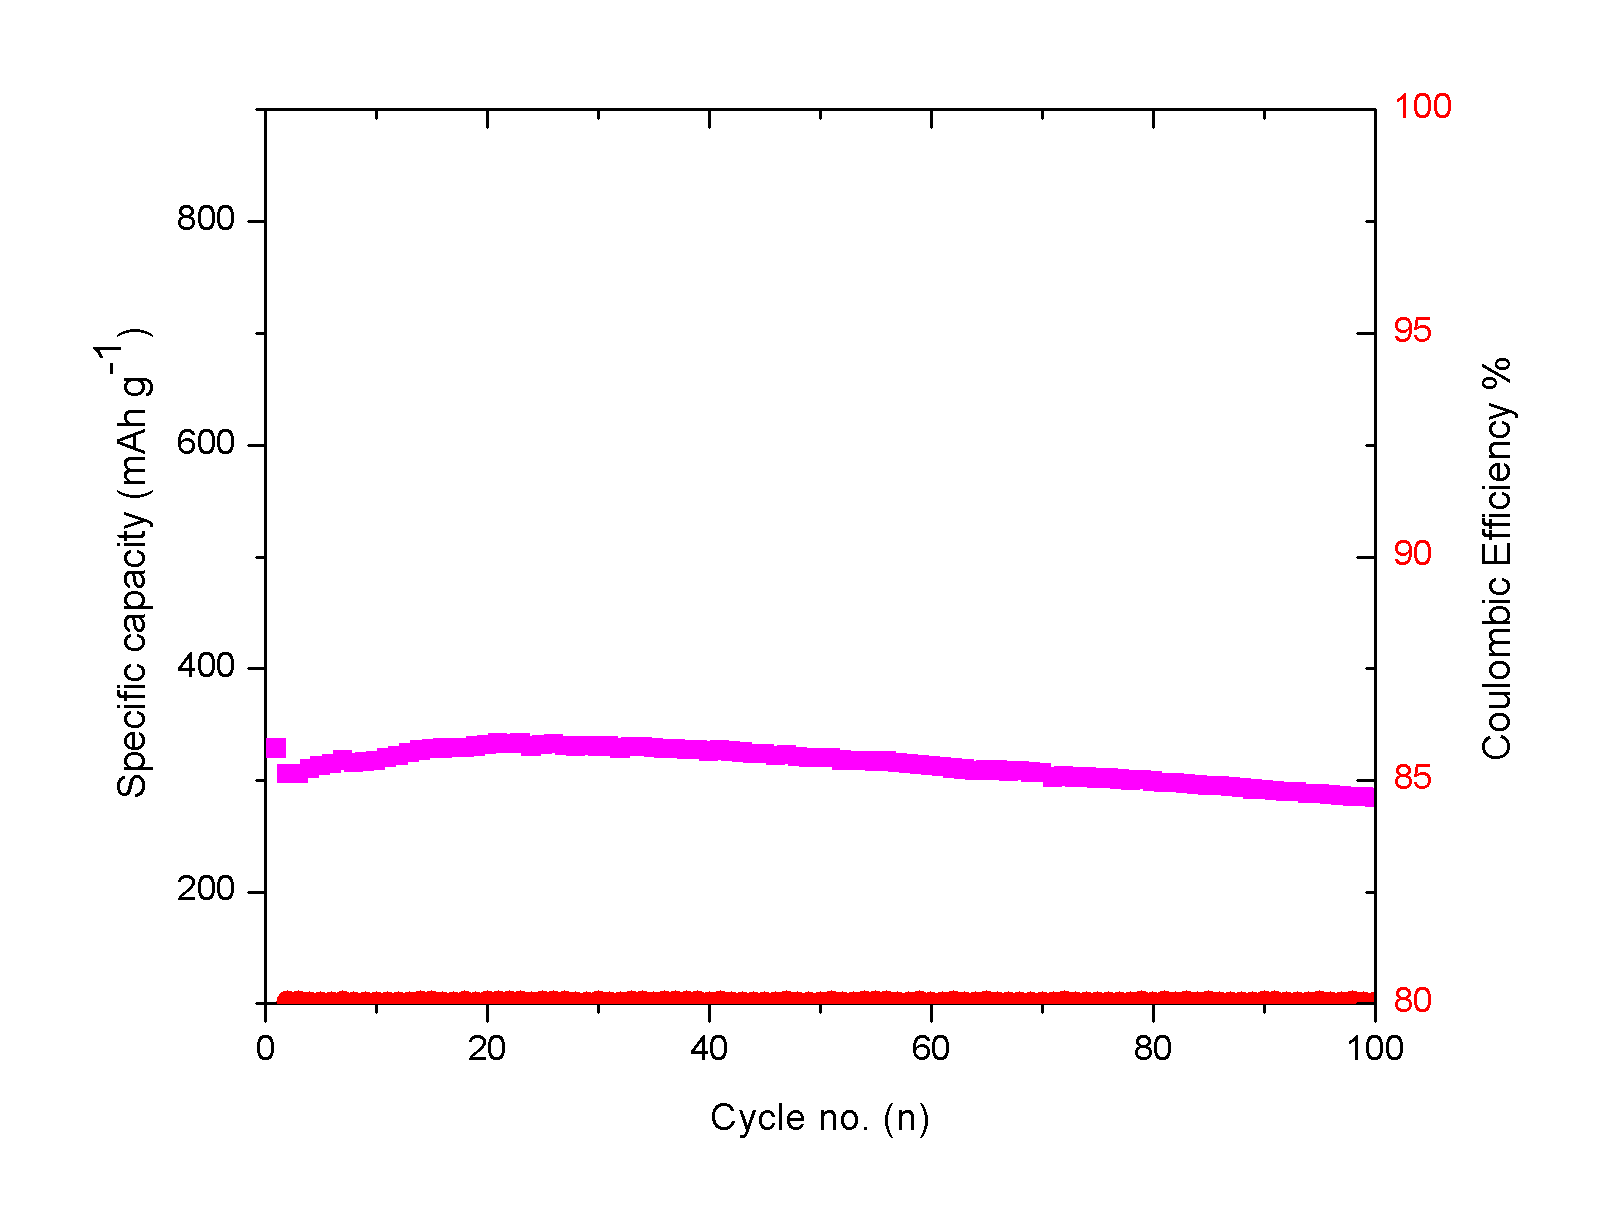


S 1Fig. Cycling performance of the Br2/ Electrodeposition electrode in 0.1 M H2SO4 + 0.1 M RbCl electrolyte at 1 A g-1. The cell was tested at 0 ~ 1 V vs. standard hydrogen electrode.


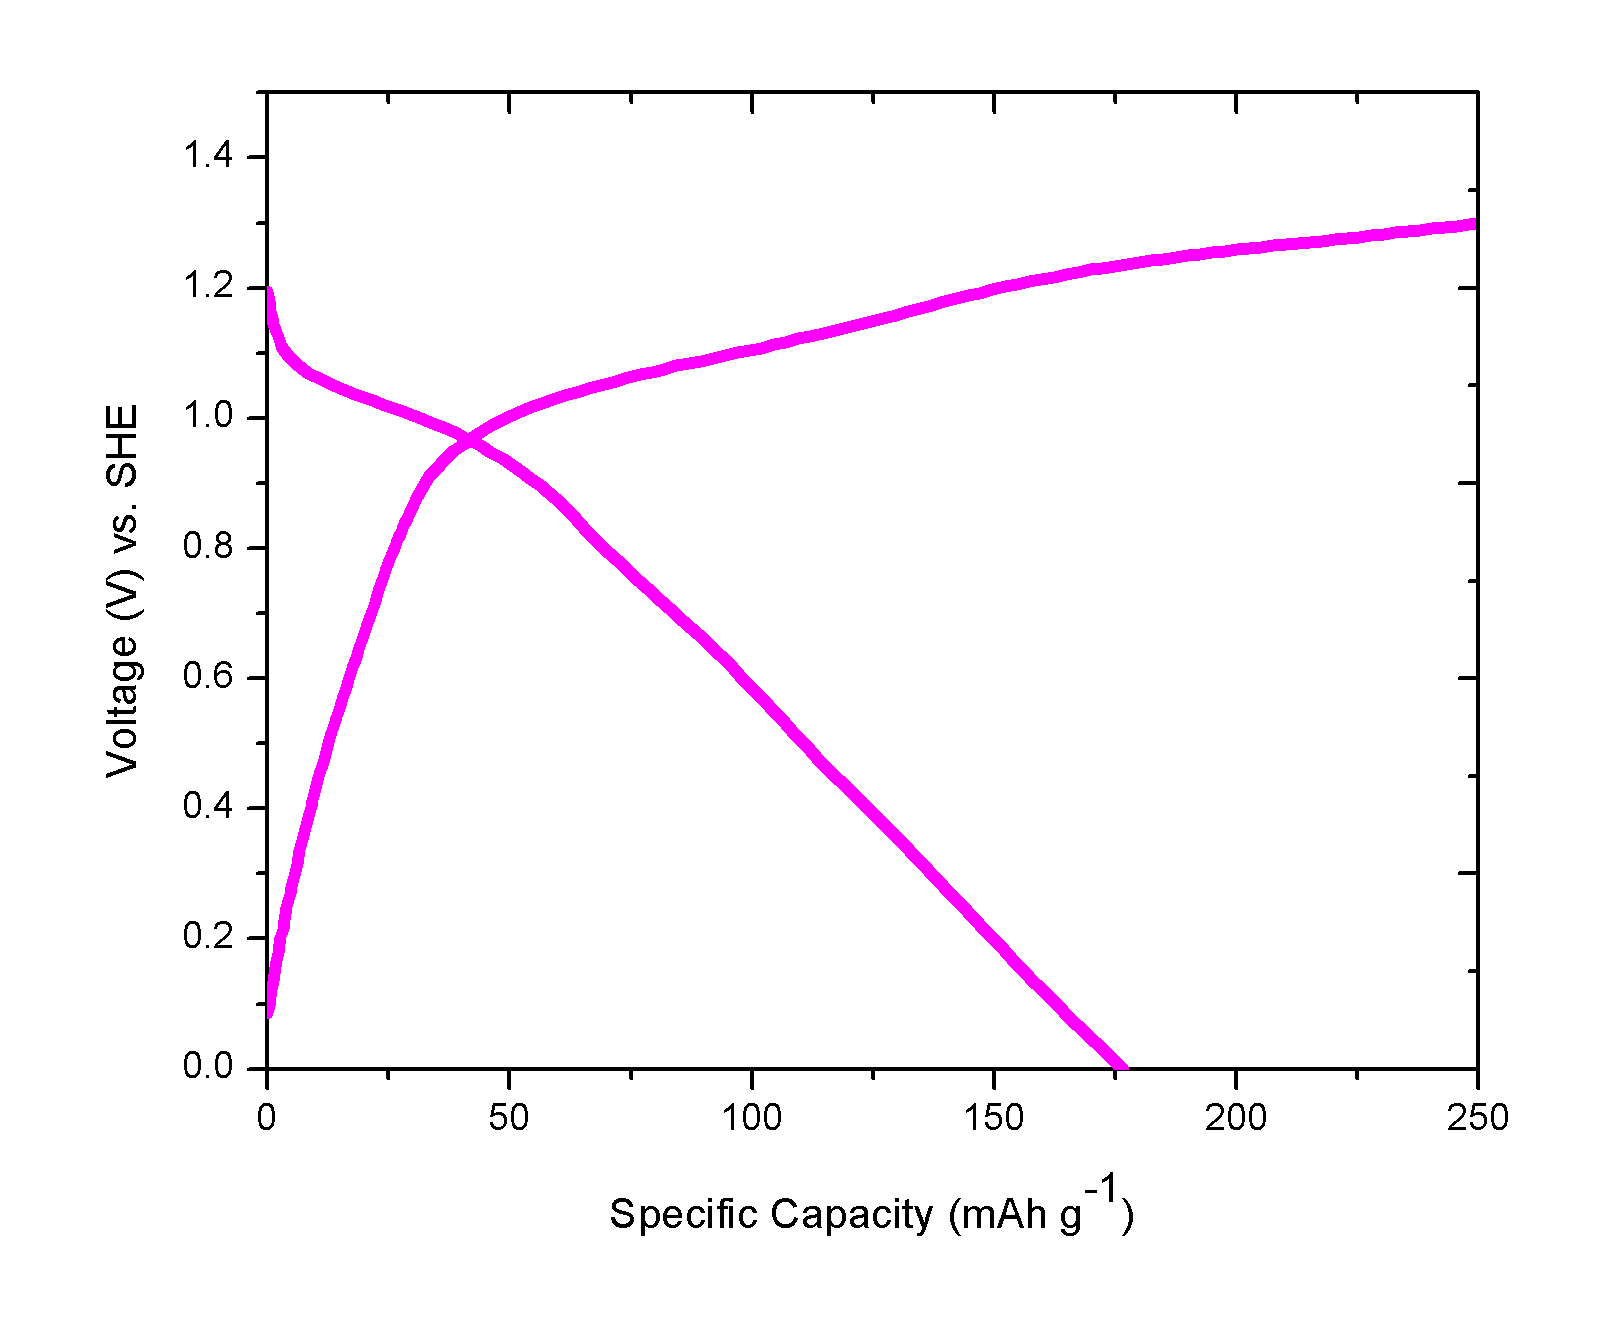


S2 Fig.Voltage of the electrodeposition electrode in electrolyte. The capacity is measured based on the mass loading of bromine (1.5 mg cm-2).


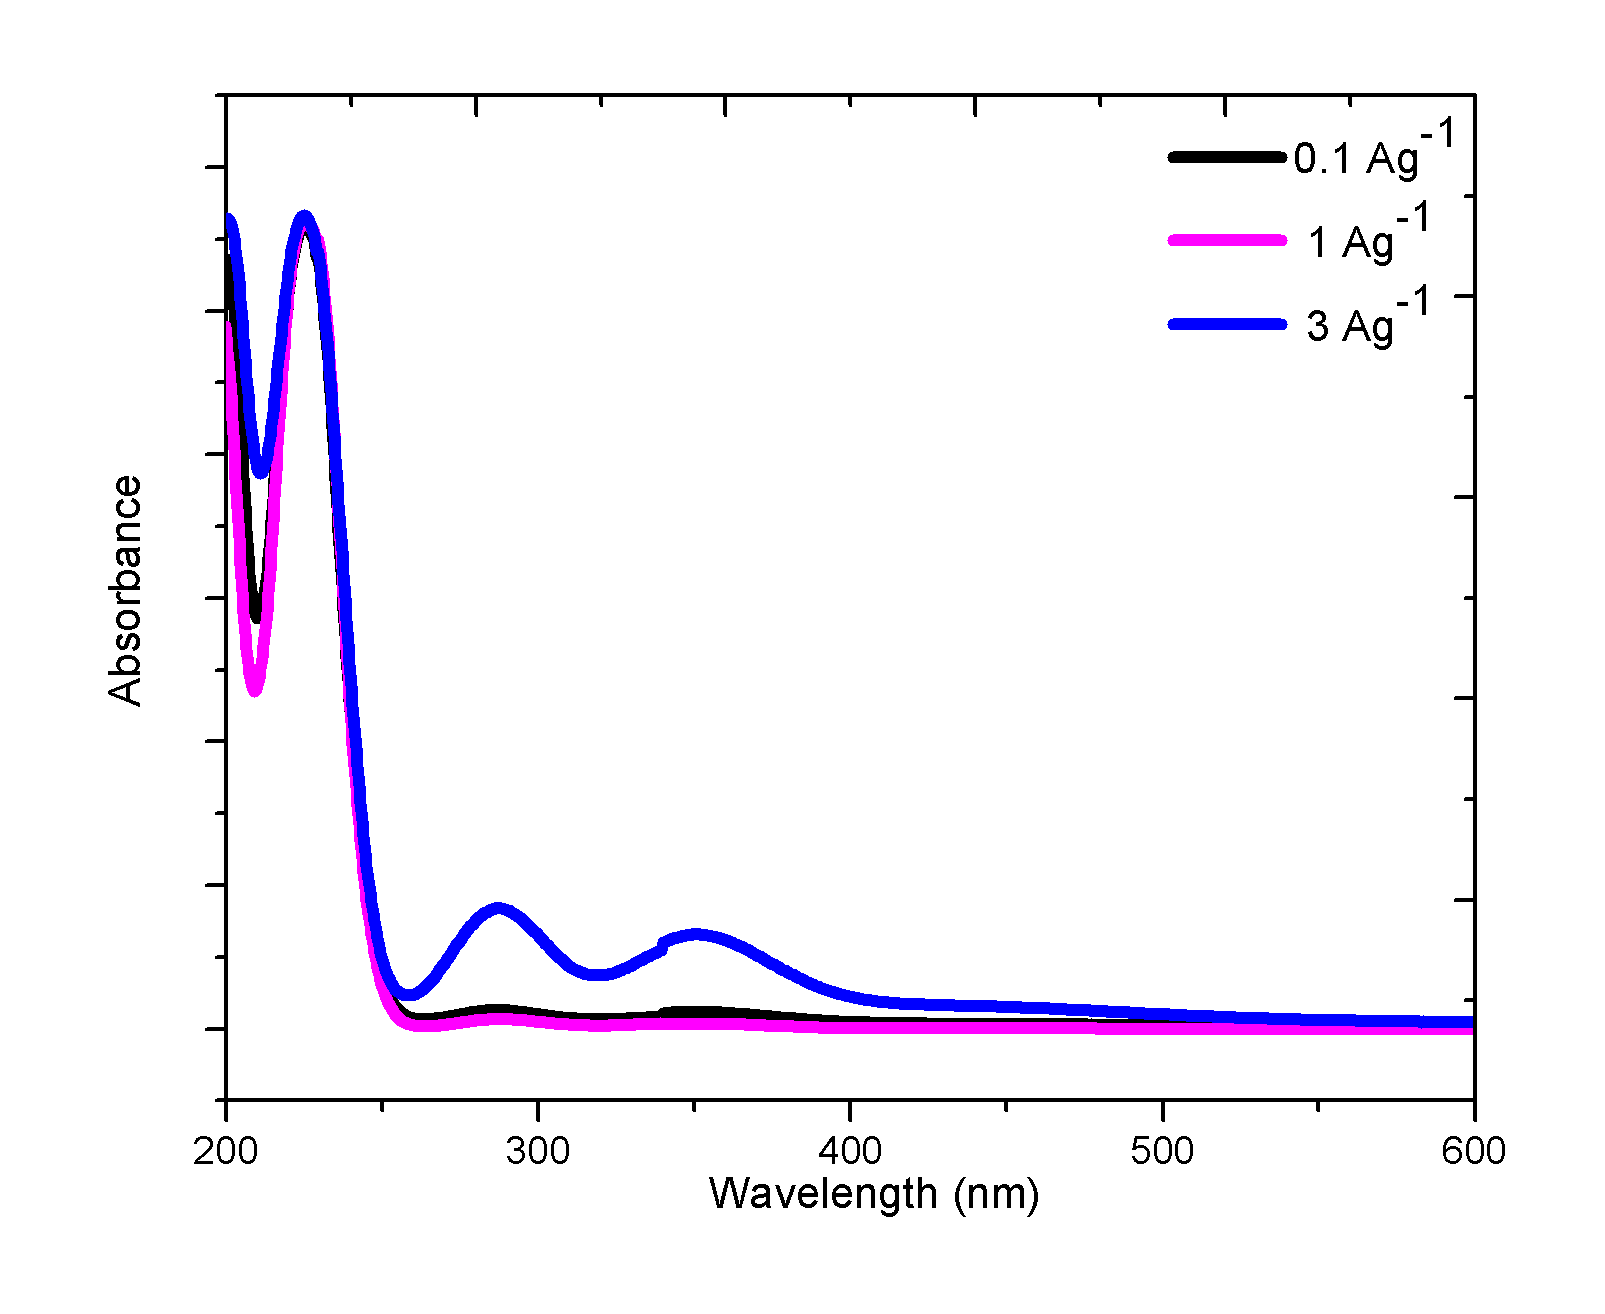


S3 Fig.The BrO3- at current densities was demonstrated by the chromogenic reaction with bromide. UV-vis spectra of the E-extracted solution at different current densities after the color titration in 0.1 M H2SO4 + 0.1 M RbCl electrolyte. The solution was obtained at discharge.


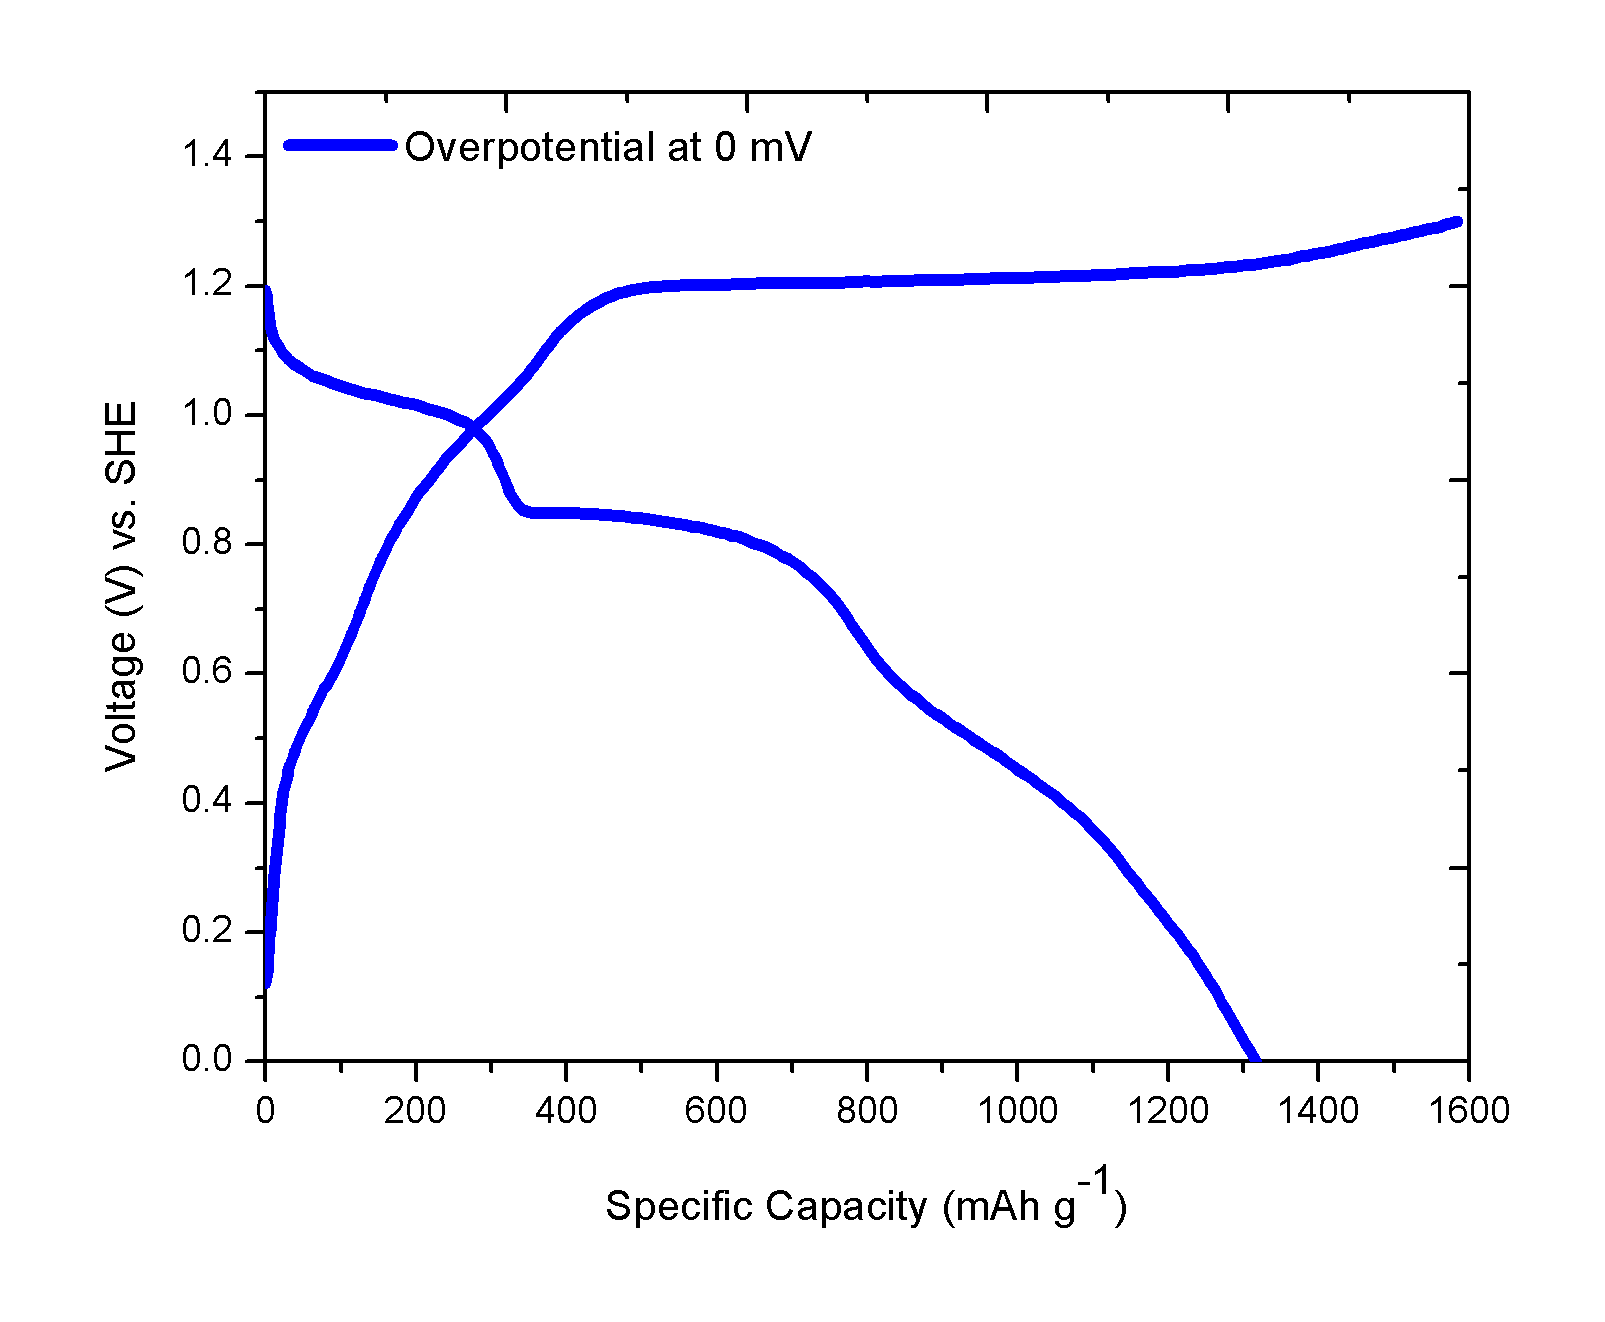


S4 Fig.The overpotential of Br2 deposition in 0.1 M H2SO4 + 0.1 M RbCl electrolyte at 1 A g-1.


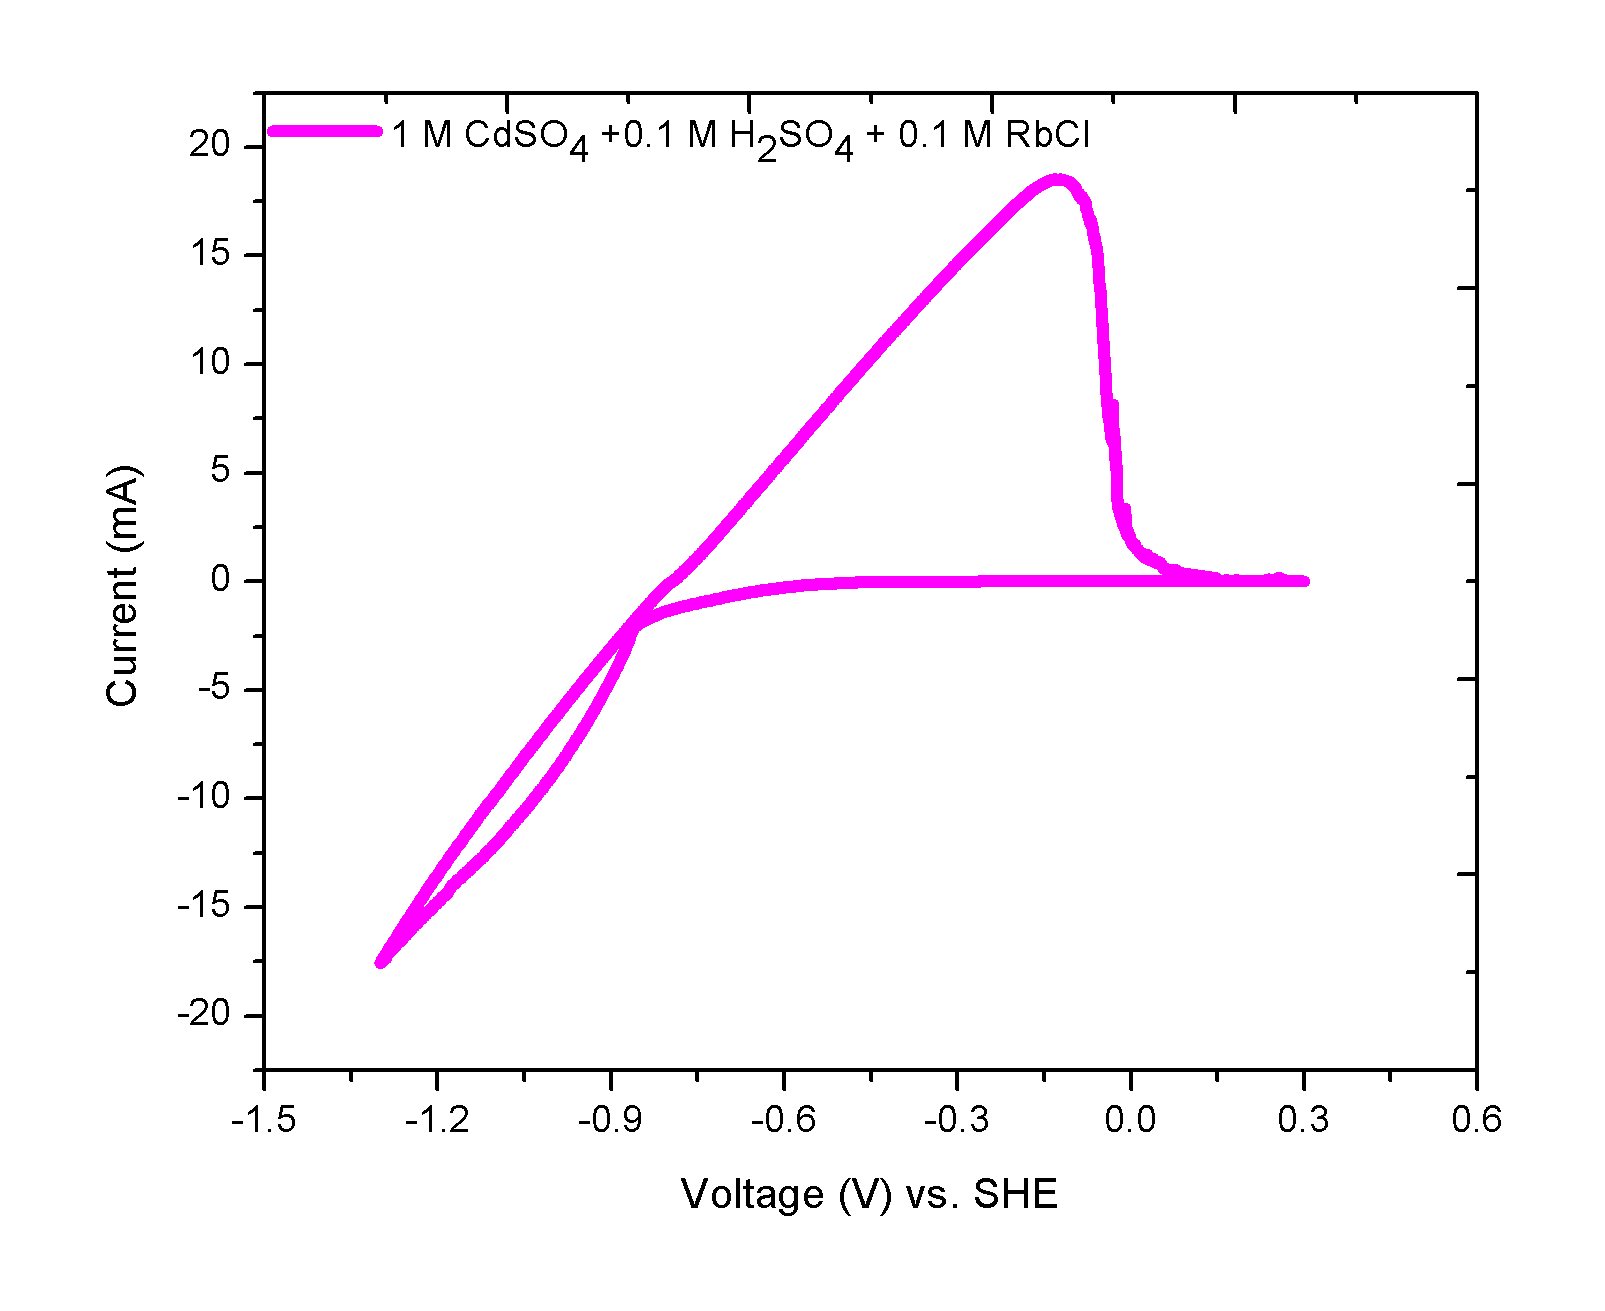
 S5 Fig.Stable Cadmium plating/stripping in an acidic electrolyte CV curve of 1 M CdSO4 + 0.1 M H2SO4 + 0.1 M RbCl electrolyte at a sweep rate of 0.5 mV s-1. The CV curve, Al foil counter electrode and Hg/Hg2SO4 reference electrode.
